# Supplementary material for: Low incidence of antibiotic-resistant bacteria in south-east Sweden: An epidemiologic study on 9268 cases of bloodstream infection
Source: PubMed Central journal article supplement (PMC7100936; doi:10.1371/journal.pone.0230501), 2020-03-27
Supplement: pone.0230501.s001.pdf [file pone.0230501.s001.pdf]

**S1 Fig. Bloodstream infections per 100 000 hospital admissions and year.**

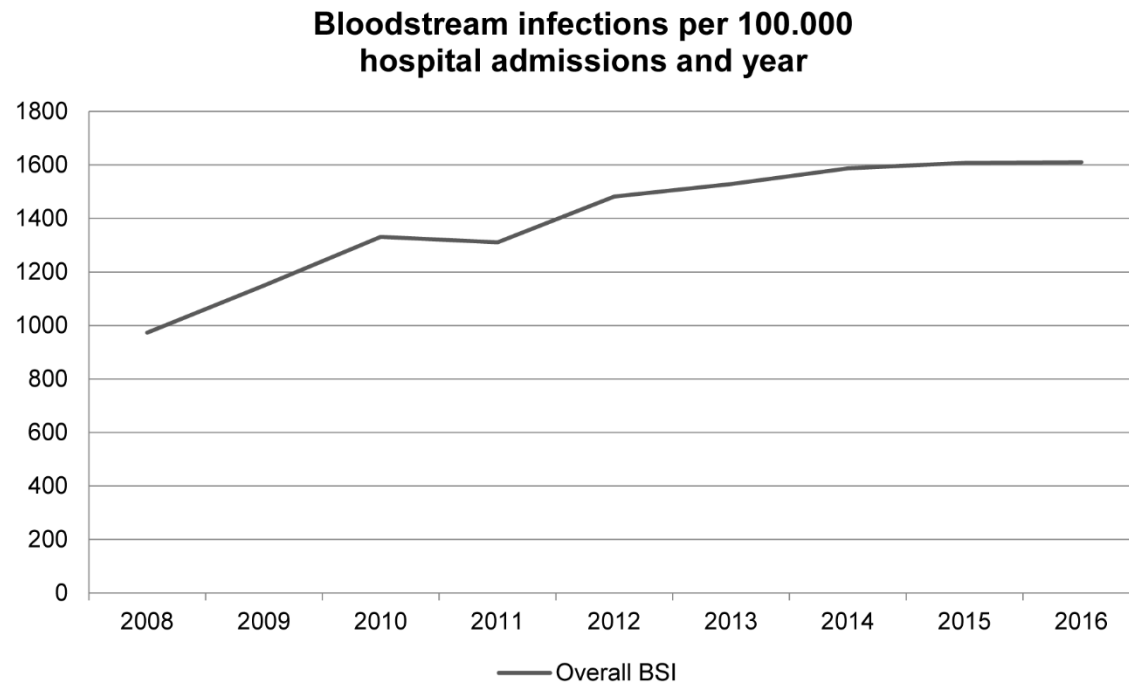

*Incidence of BSI increased by 66% from 973 to 1610 per 100 000 hospital admissions per year during the study period (Linear regression) ( $p < 0.01$ ).*
