# Supplementary material for: Low incidence of antibiotic-resistant bacteria in south-east Sweden: An epidemiologic study on 9268 cases of bloodstream infection
Source: PubMed Central journal article supplement (PMC7100936; doi:10.1371/journal.pone.0230501), 2020-03-27
Supplement: pone.0230501.s002.pdf [file pone.0230501.s002.pdf]

**S2 Fig. 30-day all-cause mortality due to BSI per 100 000 hospital admissions and year.**

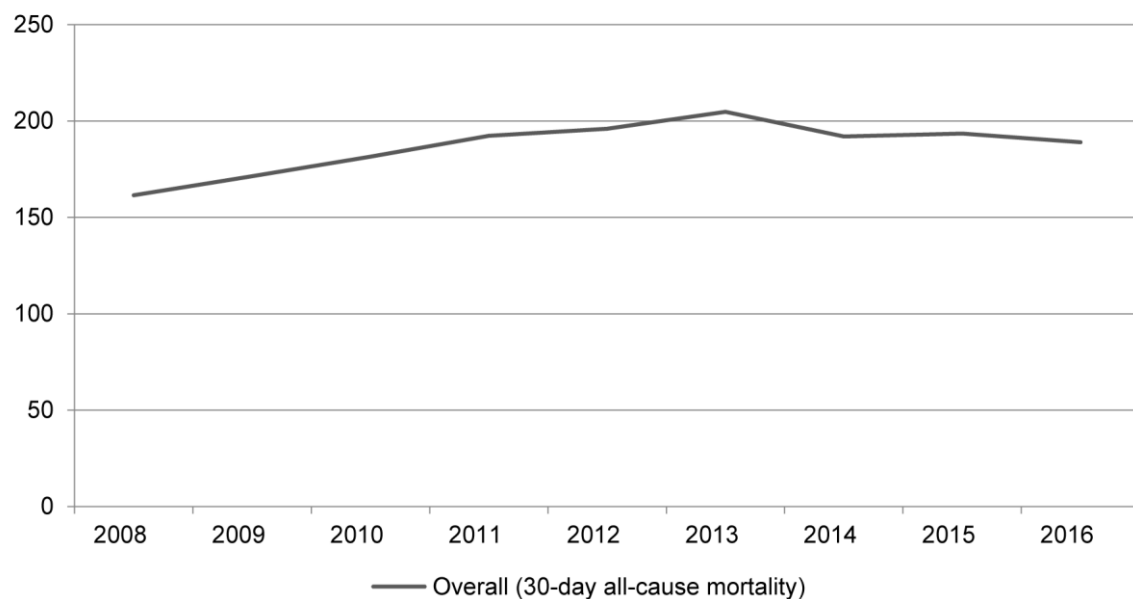

*30-day all-cause mortality due to BSI increased by 17% from 162 to 189 per 100,000 hospital admissions and year during the study period (Linear regression) ( $p=0.03$ ).*
