# Supplementary material for: Low incidence of antibiotic-resistant bacteria in south-east Sweden: An epidemiologic study on 9268 cases of bloodstream infection
Source: PubMed Central journal article supplement (PMC7100936; doi:10.1371/journal.pone.0230501), 2020-03-27
Supplement: pone.0230501.s003.pdf [file pone.0230501.s003.pdf]

**S3 Table. Increase in BSI per microorganism per 100,000 hospital admissions and year, 2008-2016.**

|                       | 2008 | 2009 | 2010 | 2011 | 2012 | 2013 | 2014 | 2015 | 2016 | Change %* | Average yearly increase** | 95% CI      | p-value |
|-----------------------|------|------|------|------|------|------|------|------|------|-----------|---------------------------|-------------|---------|
| Escherichia coli      | 277  | 352  | 443  | 408  | 470  | 525  | 574  | 680  | 534  | 93%       | 40                        | 22.63-57.13 | <0.01   |
| Staphylococcus aureus | 209  | 231  | 290  | 213  | 339  | 343  | 314  | 297  | 323  | 55%       | 14                        | 1.72-26.05  | 0.03    |
| Proteus Mirabilis     | 13   | 15   | 19   | 22   | 26   | 20   | 33   | 52   | 36   | 177%      | 4                         | 1.64-5.90   | <0.01   |
| Candida albicans      | 16   | 15   | 30   | 37   | 23   | 23   | 45   | 76   | 59   | 269%      | 6                         | 8.56-33.73  | 0.01    |

\* Change in rate from 2008-2016 per 100,000 hospital admissions.

\*\* Average annual increase % (linear regression per 100,000 hospital admission).
