# Supplementary material for: Low incidence of antibiotic-resistant bacteria in south-east Sweden: An epidemiologic study on 9268 cases of bloodstream infection
Source: PubMed Central journal article supplement (PMC7100936; doi:10.1371/journal.pone.0230501), 2020-03-27
Supplement: pone.0230501.s005.pdf [file pone.0230501.s005.pdf]

**S5 Table. Blood culture characteristics (hospital admission, blood cultures, microorganism, blood culture per hospital admission, and positive blood culture per total number of blood cultures and hospital admissions).**

| Year                      | Hospital admission | Hospital day | Population in Östergötland | Age, median* | Total number of blood cultures | Positive blood cultures | Micro organism** | BSI          | Blood cultures per hospital admission (%)*** | Positive blood cultures per total number of blood cultures (%) | Positive blood cultures per hospital admission (%) |
|---------------------------|--------------------|--------------|----------------------------|--------------|--------------------------------|-------------------------|------------------|--------------|----------------------------------------------|----------------------------------------------------------------|----------------------------------------------------|
| 2008                      | 69 363             | 378 999      | 423 169                    | 69           | 7 860                          | 793                     | 712              | 675          | 11.3                                         | 10.1                                                           | 1.1                                                |
| 2009                      | 72 383             | 324 711      | 427 106                    | 69           | 8 710                          | 1 022                   | 847              | 832          | 12.0                                         | 11.7                                                           | 1.4                                                |
| 2010                      | 72 766             | 337 520      | 429 642                    | 69           | 9 211                          | 1 100                   | 988              | 969          | 12.7                                         | 11.9                                                           | 1.5                                                |
| 2011                      | 73 849             | 330 589      | 431 075                    | 68           | 10 062                         | 1 102                   | 985              | 968          | 13.6                                         | 11.0                                                           | 1.5                                                |
| 2012                      | 75 516             | 332 719      | 433 784                    | 69           | 11 394                         | 1 264                   | 1 165            | 1 119        | 15.1                                         | 11.1                                                           | 1.7                                                |
| 2013                      | 75 214             | 332 745      | 437 848                    | 69           | 11 632                         | 1 314                   | 1 157            | 1 150        | 15.5                                         | 11.3                                                           | 1.7                                                |
| 2014                      | 75 547             | 344 580      | 442 105                    | 69           | 12 041                         | 1 316                   | 1 235            | 1 199        | 15.9                                         | 10.9                                                           | 1.7                                                |
| 2015                      | 73 407             | 343 795      | 445 661                    | 69           | 13 325                         | 1 287                   | 1 312            | 1 180        | 18.2                                         | 9.7                                                            | 1.8                                                |
| 2016                      | 73 033             | 318 081      | 452 105                    | 70           | 14 128                         | 1 293                   | 1186             | 1 176        | 19.3                                         | 9.2                                                            | 1.8                                                |
| <b>Total/p-value ****</b> |                    |              |                            |              | <b>98 363</b>                  | <b>10 491</b>           | <b>9 587</b>     | <b>9 268</b> | <0.01                                        | 0.11                                                           | <0.01                                              |
| <b>Change (%) *****</b>   |                    |              |                            |              |                                |                         |                  |              | 71%                                          | -8.9%                                                          | 64%                                                |

\* Median age (25-75 percentiles) of patients from whom the blood culture were obtained

\*\* Microorganism (bacterial and yeast isolates) typically belonging to the skin microbiota (coagulase-negative-*Staphylococci* (CoNS), *Micrococcus* spp., *Bacillus* spp., *Corynebacterium* spp., *Propionibacterium* spp.) were considered probable contaminants and excluded.

\*\*\*All blood cultures taken per hospital admissions

\*\*\*\*P-value for trend (2008-2016), Linear regression

\*\*\*\*\*Change (%) 2008 vs 2016)
