# Supplementary material for: Low incidence of antibiotic-resistant bacteria in south-east Sweden: An epidemiologic study on 9268 cases of bloodstream infection
Source: PubMed Central journal article supplement (PMC7100936; doi:10.1371/journal.pone.0230501), 2020-03-27
Supplement: pone.0230501.s006.pdf [file pone.0230501.s006.pdf]

**S6 Table. Incidence of BSI per microorganism and antimicrobial resistance (2008-2016).**

|                                      | 2008 R (%) | 2009 R (%) | 2010 R (%) | 2011 R (%) | 2012 R (%) | 2013 R (%) | 2014 R (%) | 2015 R (%) | 2016 R (%) | Change %    | Regression per 100 000 hospital admissions |                    |                 |
|--------------------------------------|------------|------------|------------|------------|------------|------------|------------|------------|------------|-------------|--------------------------------------------|--------------------|-----------------|
|                                      |            |            |            |            |            |            |            |            |            |             | Average annual increase %                  | 95% CI             | p-value         |
| <b>Gram-negative</b>                 |            |            |            |            |            |            |            |            |            |             |                                            |                    |                 |
| <b>Other than Enterobacteriaceae</b> |            |            |            |            |            |            |            |            |            |             |                                            |                    |                 |
| <i>Acinetobacter baumannii</i>       | <b>0</b>   | <b>1</b>   | <b>4</b>   | <b>2</b>   | <b>1</b>   | <b>5</b>   | <b>9</b>   | <b>0</b>   | <b>3</b>   | <b>-</b>    | <b>0.5</b>                                 | <b>-0.70-1.67</b>  | <b>0.36</b>     |
| Tobramycin                           | 0          | 0          | 0          | 100        | 100        | 20         | 66.7       | 0          | 33.3       |             | 4                                          | -14.08-22.42       | <b>0.61</b>     |
| Meropenem                            | 0          | 0          | 0          | 0          | 0          | 20         | 55.6       | 0          | 33.3       |             | 6                                          | -1.11-12.98        | <b>0.09</b>     |
| Imipenem                             | 0          | 0          | 0          | 0          | 0          | 20         | 44.4       | 0          | 33.3       |             | 5                                          | -0.39-11.28        | <b>0.06</b>     |
| Ciprofloxacin                        | 0          | 0          | 0          | 0          | 0          | 20         | 88.9       | 0          | 33.3       |             | 7                                          | -3.74-18.56        | <b>0.16</b>     |
| Amikacin                             | 0          | 0          | 0          | 0          | 0          | 20         | 88.9       | 0          | 0          |             | 4                                          | -7.79-16.52        | <b>0.42</b>     |
| <i>Pseudomonas aeruginosa</i>        | <b>20</b>  | <b>27</b>  | <b>20</b>  | <b>22</b>  | <b>28</b>  | <b>25</b>  | <b>19</b>  | <b>37</b>  | <b>26</b>  | <b>24%</b>  | <b>1</b>                                   | <b>-1.18-3.36</b>  | <b>0.30</b>     |
| Ceftazidime                          | 0          | 3.7        | 0          | 13.6       | 14.3       | 16         | 0          | 5.4        | 7.7        |             | 1                                          | -1.86-3.58         | <b>0.48</b>     |
| Imipenem                             | 0          | 3.7        | 5          | 13.6       | 17.9       | 16         | 15.8       | 5.4        | 7.7        |             | 1                                          | -1.18-3.84         | <b>0.25</b>     |
| Ciprofloxacin                        | 5          | 14.8       | 5          | 18.2       | 14.3       | 16         | 5.3        | 8.1        | 3.8        |             | -1                                         | -3.07-1.76         | <b>0.54</b>     |
| Tobramycin                           | 0          | 0          | 0          | 9.1        | 0          | 0          | 0          | 0          | 0          |             | 0                                          | -1.53-1.12         | <b>0.73</b>     |
| Meropenem                            | 5          | 7.4        | 0          | 9.1        | 7.1        | 12         | 5.3        | 0          | 11.5       |             | 0.4                                        | -1.53-2.24         | <b>0.67</b>     |
| Piperacillin-Tazobactam              | 0          | 7.4        | 0          | 13.6       | 14.3       | 16         | 15.8       | 13.5       | 19.2       |             | 3                                          | 1.25-4.56          | <b>&lt;0.01</b> |
| <i>Haemophilus influenzae</i>        | <b>5</b>   | <b>4</b>   | <b>3</b>   | <b>8</b>   | <b>13</b>  | <b>4</b>   | <b>7</b>   | <b>6</b>   | <b>4</b>   | <b>-24%</b> | <b>0</b>                                   | <b>-1.22-1.41</b>  | <b>0.87</b>     |
| Penicillin G                         | 0          | 0          | 0          | 0          | 21.4       | 14.3       | 14.3       | 50         | 25         |             | 7                                          | 2.12-11.15         | <b>0.01</b>     |
| Tetracycline                         | 0          | 0          | 0          | 0          | 0          | 0          | 0          | 0          | 0          |             |                                            |                    |                 |
| Trimethoprimsulfa                    | 0          | 0          | 0          | 12.5       | 21.4       | 71.4       | 28.6       | 33.3       | 25         |             | 7                                          | -0.50-14.72        | <b>0.06</b>     |
| <b>Enterobacteriaceae</b>            |            |            |            |            |            |            |            |            |            |             |                                            |                    |                 |
| <i>Escherichia coli</i>              | <b>192</b> | <b>255</b> | <b>322</b> | <b>301</b> | <b>355</b> | <b>395</b> | <b>434</b> | <b>499</b> | <b>390</b> | <b>93%</b>  | <b>40</b>                                  | <b>22.63-57.13</b> | <b>&lt;0.01</b> |
| Cefotaxime                           | 4.7        | 5.1        | 2.2        | 2.7        | 3.9        | 5.8        | 5.3        | 6.2        | 3.8        |             | 0                                          | -0.42-0.75         | <b>0.52</b>     |
| Tobramycin                           | 1          | 2          | 1.6        | 1.7        | 6.8        | 2.5        | 3.9        | 6.2        | 4.9        |             | 1                                          | 0.11-1.39          | <b>0.03</b>     |
| Trimethoprimsulfa                    | 17.7       | 24.7       | 18.3       | 18.3       | 23.7       | 20.8       | 17.5       | 20.4       | 16.2       |             | -1                                         | -1.72-0.60         | <b>0.29</b>     |
| Ceftazidime                          | 4.2        | 4.3        | 0.9        | 2.3        | 2.8        | 5.3        | 4.6        | 6.4        | 4.1        |             | 0                                          | -0.33-1.00         | <b>0.27</b>     |
| Piperacillin-Tazobactam              | 4.2        | 2.4        | 0.9        | 1          | 3.1        | 2.3        | 0.2        | 4.4        | 2.8        |             | 0                                          | -0.68-0.65         | <b>0.95</b>     |

|                                     |           |           |           |           |           |           |           |           |           |            |            |                   |             |
|-------------------------------------|-----------|-----------|-----------|-----------|-----------|-----------|-----------|-----------|-----------|------------|------------|-------------------|-------------|
| Meropenem                           | 0         | 0         | 0         | 0         | 0         | 0         | 0         | 0         | 0         |            |            |                   |             |
| Imipenem                            | 0         | 0         | 0         | 0         | 0         | 0         | 0         | 0         | 0         |            |            |                   |             |
| Ciprofloxacin                       | 6.7       | 8.2       | 9.8       | 9.7       | 12.2      | 8.6       | 12        | 14.5      | 11        | 1          | 0.16-1.51  | <b>0.02</b>       |             |
| Amikacin                            | 0         | 6.3       | 0         | 0         | 0         | 0         | 0         | 0         | 0.5       | 0          | -1.26-0.48 | <b>0.33</b>       |             |
| <b><i>Klebsiella pneumoniae</i></b> | <b>48</b> | <b>38</b> | <b>85</b> | <b>74</b> | <b>92</b> | <b>69</b> | <b>70</b> | <b>92</b> | <b>89</b> | <b>76%</b> | <b>6</b>   | <b>0.01-12.41</b> | <b>0.05</b> |
| Cefotaxime                          | 0         | 7.9       | 3.5       | 5.4       | 7.6       | 4.3       | 5.7       | 0         | 2.2       | 0          | -1.54-0.98 | <b>0.62</b>       |             |
| Tobramycin                          | 0         | 5.3       | 3.5       | 4.1       | 7.6       | 2.9       | 8.6       | 2.2       | 7.9       | 1          | -0.31-1.34 | <b>0.18</b>       |             |
| Trimethoprimsulfa                   | 8.3       | 8.1       | 12.9      | 5.4       | 13        | 5.8       | 15.7      | 10.9      | 11.2      | 1          | -0.91-1.94 | <b>0.42</b>       |             |
| Ceftazidime                         | 0         | 7.9       | 3.5       | 2.7       | 8.7       | 4.3       | 7.1       | 0         | 5.6       | 0          | -1.24-1.55 | <b>0.80</b>       |             |
| Piperacillin-Tazobactam             | 0         | 0         | 2.4       | 0         | 5.4       | 4.3       | 7.1       | 1.1       | 3.4       | 1          | -0.26-1.63 | <b>0.13</b>       |             |
| Meropenem                           | 0         | 0         | 0         | 0         | 0         | 0         | 0         | 0         | 0         |            |            |                   |             |
| Imipenem                            | 0         | 0         | 0         | 0         | 1.1       | 0         | 0         | 0         | 0         | -          | -0.16-0.16 | <b>0.99</b>       |             |
| Ciprofloxacin                       | 0         | 2.9       | 4.8       | 4.1       | 6.6       | 2.9       | 12.9      | 2.2       | 1.1       | 0          | -1.24-1.98 | <b>0.60</b>       |             |
| Amikacin                            | 0         | 0         | 0         | 0         | 0         | 0         | 1.4       | 0         | 0         | 0          | -0.13-0.26 | <b>0.74</b>       |             |
| <b><i>Klebsiella oxytoca</i></b>    | <b>23</b> | <b>17</b> | <b>27</b> | <b>33</b> | <b>33</b> | <b>33</b> | <b>32</b> | <b>36</b> | <b>23</b> | <b>-5%</b> | <b>1</b>   | <b>-1.03-3.69</b> | <b>0.23</b> |
| Cefotaxime                          | 0         | 0         | 0         | 0         | 0         | 0         | 3.1       | 0         | 8.7       | 1          | -0.09-1.95 | <b>0.07</b>       |             |
| Tobramycin                          | 0         | 0         | 0         | 0         | 0         | 0         | 0         | 0         | 0         |            |            |                   |             |
| Trimethoprimsulfa                   | 0         | 5.9       | 0         | 0         | 3         | 3         | 6.3       | 0         | 0         | 0          | -1.22-1.10 | <b>0.90</b>       |             |
| Ceftazidime                         | 0         | 0         | 0         | 0         | 0         | 0         | 0         | 0         | 0         |            |            |                   |             |
| Piperacillin-Tazobactam             | 0         | 0         | 0         | 3         | 0         | 3         | 6.3       | 11.1      | 13        | 2          | 1.18-3.26  | <b>&lt;0.01</b>   |             |
| Meropenem                           | 0         | 0         | 0         | 0         | 0         | 0         | 0         | 0         | 0         |            |            |                   |             |
| Imipenem                            | 0         | 0         | 0         | 0         | 0         | 0         | 0         | 0         | 0         |            |            |                   |             |
| Ciprofloxacin                       | 0         | 0         | 0         | 0         | 3         | 0         | 3.1       | 0         | 4.3       | 1          | -0.09-1.15 | <b>0.08</b>       |             |
| Amikacin                            | 0         | 0         | 0         | 0         | 0         | 0         | 0         | 0         | 0         |            |            |                   |             |
| <b><i>Enterobacter cloacae</i></b>  | <b>29</b> | <b>23</b> | <b>28</b> | <b>25</b> | <b>38</b> | <b>22</b> | <b>46</b> | <b>33</b> | <b>35</b> | <b>15%</b> | <b>2</b>   | <b>-1.17-4.64</b> | <b>0.20</b> |
| Cefotaxime                          | 0         | 17.4      | 14.3      | 24        | 13.2      | 18.2      | 8.7       | 15.2      | 20        | 1          | -1.64-4.14 | <b>0.34</b>       |             |
| Tobramycin                          | 0         | 0         | 0         | 0         | 0         | 0         | 0         | 0         | 0         |            |            |                   |             |
| Trimethoprimsulfa                   | 0         | 0         | 0         | 0         | 5.3       | 0         | 0         | 9.1       | 0         | 1          | -0.74-1.98 | <b>0.32</b>       |             |
| Ceftazidime                         | 0         | 8.7       | 14.3      | 24        | 10.5      | 18.2      | 4.3       | 15.2      | 22.9      | 2          | -1.22-5.07 | <b>0.19</b>       |             |
| Piperacillin-Tazobactam             | 0         | 0         | 7.1       | 16        | 10.5      | 13.6      | 4.3       | 15.2      | 17.1      | 2          | 0.32-4.48  | <b>0.03</b>       |             |
| Meropenem                           | 0         | 0         | 0         | 4         | 0         | 0         | 0         | 0         | 0         | 0          | -0.67-0.49 | <b>0.73</b>       |             |
| Imipenem                            | 0         | 0         | 0         | 0         | 0         | 0         | 0         | 0         | 0         |            |            |                   |             |
| Ciprofloxacin                       | 0         | 0         | 0         | 4         | 0         | 0         | 0         | 0         | 0         | 0          | -0.67-0.49 | <b>0.73</b>       |             |
| Amikacin                            | 0         | 0         | 0         | 0         | 0         | 0         | 0         | 0         | 0         |            |            |                   |             |

|                                 |          |           |           |           |           |           |           |           |           |             |          |                  |                 |
|---------------------------------|----------|-----------|-----------|-----------|-----------|-----------|-----------|-----------|-----------|-------------|----------|------------------|-----------------|
| <b><i>Proteus Mirabilis</i></b> | <b>9</b> | <b>11</b> | <b>14</b> | <b>16</b> | <b>20</b> | <b>15</b> | <b>25</b> | <b>38</b> | <b>26</b> | <b>174%</b> | <b>4</b> | <b>1.64-5.90</b> | <b>&lt;0.01</b> |
| Cefotaxime                      | 0        | 0         | 0         | 0         | 0         | 0         | 0         | 10.5      | 0         |             | 1        | -0.70-2.12       | <b>0.27</b>     |
| Tobramycin                      | 0        | 0         | 0         | 0         | 0         | 0         | 4         | 13.2      | 3.8       |             | 1        | -0.07-2.91       | <b>0.06</b>     |
| Trimethoprim-sulfa              | 11.1     | 0         | 7.1       | 0         | 0         | 6.7       | 24        | 31.6      | 26.9      |             | 4        | 0.60-8.24        | <b>0.03</b>     |
| Ceftazidime                     | 0        | 0         | 0         | 0         | 0         | 0         | 0         | 10.5      | 0         |             | 1        | -0.70-2.13       | <b>0.27</b>     |
| Piperacillin-Tazobactam         | 0        | 0         | 0         | 0         | 0         | 0         | 0         | 0         | 0         |             |          |                  |                 |
| Meropenem                       | 0        | 0         | 0         | 0         | 0         | 0         | 0         | 0         | 0         |             |          |                  |                 |
| Imipenem                        | 0        | 0         | 0         | 0         | 0         | 0         | 0         | 0         | 0         |             |          |                  |                 |
| Ciprofloxacin                   | 0        | 0         | 0         | 0         | 0         | 0         | 0         | 2.7       | 3.8       |             | 1        | 0.08-0.98        | <b>0.03</b>     |
| Amikacin                        | 0        | 0         | 0         | 0         | 0         | 0         | 0         | 5.3       | 0         |             | 0        | -0.36-1.08       | <b>0.27</b>     |

### Gram-positive

#### Enterococci

|                                     |           |           |           |           |           |           |           |           |           |            |          |                   |             |
|-------------------------------------|-----------|-----------|-----------|-----------|-----------|-----------|-----------|-----------|-----------|------------|----------|-------------------|-------------|
| <b><i>Enterococcus faecalis</i></b> | <b>35</b> | <b>57</b> | <b>50</b> | <b>40</b> | <b>58</b> | <b>62</b> | <b>84</b> | <b>53</b> | <b>52</b> | <b>41%</b> | <b>3</b> | <b>-2.16-8.04</b> | <b>0.21</b> |
| Ampicillin                          | 0         | 0         | 0         | 0         | 0         | 0         | 0         | 0         | 0         |            |          |                   |             |
| Imipenem                            | 0         | 0         | 0         | 0         | 0         | 1.6       | 0         | 0         | 0         |            | 0        | -0.19-0.26        | <b>0.73</b> |
| Linezolid                           | 8.6       | 3.6       | 0         | 0         | 0         | 1.6       | 0         | 1.9       | 0         |            | -1       | -1.98-0.16        | <b>0.08</b> |
| Vancomycin                          | 0         | 0         | 0         | 0         | 1.7       | 0         | 0         | 1.9       | 0         |            | 0        | -0.20-0.46        | <b>0.38</b> |
| <b><i>Enterococcus faecium</i></b>  | <b>16</b> | <b>33</b> | <b>14</b> | <b>20</b> | <b>26</b> | <b>33</b> | <b>25</b> | <b>32</b> | <b>23</b> | <b>36%</b> | <b>1</b> | <b>-1.69-4.09</b> | <b>0.36</b> |
| Ampicillin                          | 68.8      | 78.8      | 78.6      | 95        | 73.1      | 97        | 68        | 84.4      | 87        |            | 1        | -3.34-5.42        | <b>0.59</b> |
| Imipenem                            | 58.3      | 92        | 100       | 100       | 80.8      | 97        | 68        | 84.4      | 87        |            | 0        | -6.19-6.27        | <b>0.84</b> |
| Linezolid                           | 0         | 3         | 0         | 0         | 0         | 0         | 0         | 3.1       | 4.3       |            | 0        | -0.31-1.10        | <b>0.23</b> |
| Vancomycin                          | 0         | 0         | 0         | 0         | 0         | 0         | 0         | 0         | 0         |            |          |                   |             |

#### Staphylococci

|                                     |            |            |            |            |            |            |            |            |            |            |           |                   |             |
|-------------------------------------|------------|------------|------------|------------|------------|------------|------------|------------|------------|------------|-----------|-------------------|-------------|
| <b><i>Staphylococcus aureus</i></b> | <b>145</b> | <b>167</b> | <b>211</b> | <b>157</b> | <b>256</b> | <b>258</b> | <b>237</b> | <b>218</b> | <b>236</b> | <b>55%</b> | <b>14</b> | <b>1.72-26.05</b> | <b>0.03</b> |
| Cefoxitin                           | 0          | 0          | 0          | 0          | 0          | 0          | 0.4        | 0          | 1.3        |            | 0         | -0.02-0.29        | <b>0.07</b> |
| Fusidic acid                        | 2.8        | 1.2        | 1.9        | 3.8        | 3.1        | 4.7        | 6.3        | 1.8        | 3          |            | 0         | -0.38-0.89        | <b>0.38</b> |
| Erythromycin                        | 4.8        | 2.4        | 4.7        | 3.2        | 4.3        | 3.5        | 3          | 4.6        | 4.7        |            | 0         | -0.38-0.46        | <b>0.84</b> |
| Clindamycin                         | 4.1        | 2.4        | 4.3        | 3.2        | 3.1        | 2.3        | 3          | 3.7        | 4.2        |            | 0         | -0.37-0.35        | <b>0.95</b> |
| Tobramycin                          | 0          | 1.8        | 0.9        | 0.6        | 1.2        | 3.5        | 2.5        | 1.8        | 1.3        |            | 0         | -0.14-0.64        | <b>0.18</b> |
| Linezolid                           | 0.7        | 0          | 0          | 0          | 0          | 0.4        | 0          | 0          | 0          |            | 0         | -0.16-0.05        | <b>0.23</b> |
| Rifampicin                          | 0          | 0          | 0          | 0          | 0          | 0          | 0.4        | 0          | 1.7        |            | 0         | -0.03-0.37        | <b>0.08</b> |
| Vancomycin                          |            | 0          |            |            |            |            |            |            |            |            |           |                   |             |

#### Streptococci

|                                     |           |           |           |           |           |           |           |           |           |             |           |                    |             |
|-------------------------------------|-----------|-----------|-----------|-----------|-----------|-----------|-----------|-----------|-----------|-------------|-----------|--------------------|-------------|
| <i>Streptococcus pneumoniae</i>     | <b>59</b> | <b>72</b> | <b>53</b> | <b>65</b> | <b>52</b> | <b>50</b> | <b>57</b> | <b>48</b> | <b>51</b> | <b>-18%</b> | <b>-3</b> | <b>-5.67--0.32</b> | <b>0.03</b> |
| Oxacillin                           | 0         | 0         | 0         | 7.7       | 9.8       | 8         | 0         | 6.3       | 3.9       |             | 1         | -0.84-2.42         | <b>0.29</b> |
| Erythromycin                        | 5.1       | 2.8       | 0         | 7.7       | 3.8       | 4         | 1.7       | 8.3       | 2         |             | 0         | -1.17-1.28         | <b>0.92</b> |
| Clindamycin                         | 0         | 0         | 1.9       | 6.2       | 1.9       | 6         | 0         | 6.3       | 2         |             | 1         | -0.59-1.63         | <b>0.31</b> |
| Tetracycline                        | 3.4       | 1.4       | 0         | 7.7       | 3.8       | 4         | 0         | 6.3       | 3.9       |             | 0         | -0.85-1.41         | <b>0.58</b> |
| Trimethoprimsulfa                   | 5.1       | 5.6       | 1.9       | 7.7       | 9.6       | 14        | 5.2       | 6.3       | 9.8       |             | 1         | -0.64-2.09         | <b>0.25</b> |
| Penicillin G                        | 0         | 0         | 0         | 3.2       | 2.2       | 4.3       | 0         | 0         | 2.1       |             | 0         | -0.49-0.92         | <b>0.50</b> |
| Norfloxacin                         | 0         | 0         | 0         | 0         | 2         | 0         | 8.8       | 2.1       | 5.9       |             | 1         | 0.04-2.08          | <b>0.04</b> |
| <i>Streptococcus pyogenes (A)</i>   | <b>10</b> | <b>20</b> | <b>10</b> | <b>20</b> | <b>23</b> | <b>23</b> | <b>11</b> | <b>28</b> | <b>17</b> | <b>62%</b>  | <b>1</b>  | <b>-1.39-3.80</b>  | <b>0.31</b> |
| Penicillin G                        | 0         | 0         | 0         | 0         | 0         | 0         | 0         | 0         | 0         |             |           |                    |             |
| Erythromycin                        | 20        | 5         | 0         | 0         | 0         | 0         | 0         | 0         | 0         |             | -2        | -4.66-0.12         | <b>0.06</b> |
| Clindamycin                         | 10        | 5         | 0         | 0         | 4.3       | 0         | 0         | 0         | 0         |             | -1        | -2.49-(-0.13)      | <b>0.03</b> |
| Penicillin G                        |           |           |           |           |           |           |           |           |           |             |           |                    |             |
| <i>Streptococcus agalactiae (B)</i> | <b>21</b> | <b>12</b> | <b>18</b> | <b>18</b> | <b>19</b> | <b>22</b> | <b>20</b> | <b>25</b> | <b>27</b> | <b>22%</b>  | <b>1</b>  | <b>0.01-2.91</b>   | <b>0.05</b> |
| Penicillin G                        | 0         | 0         | 0         | 0         | 0         | 0         | 0         | 0         | 0         |             |           |                    |             |
| Erythromycin                        | 4.8       | 8.3       | 5.6       | 11.1      | 0         | 4.5       | 10        | 0         | 22.2      |             | 1         | -1.85-3.90         | <b>0.43</b> |
| Clindamycin                         | 4.8       | 8.3       | 5.6       | 5         | 0         | 0         | 5         | 0         | 14.8      |             | 0         | -1.96-2.30         | <b>0.86</b> |
| Penicillin G                        |           |           |           |           |           |           |           |           |           |             |           |                    |             |
| <i>Streptococcus spp. (C, G)</i>    | <b>23</b> | <b>25</b> | <b>30</b> | <b>24</b> | <b>38</b> | <b>34</b> | <b>23</b> | <b>25</b> | <b>14</b> | <b>-42%</b> | <b>1</b>  | <b>-3.89-1.68</b>  | <b>0.38</b> |
| Penicillin G                        | 0         | 0         | 0         | 0         | 0         | 0         | 0         | 0         | 0         |             |           |                    |             |
| Erythromycin                        | 4.3       | 0         | 0         | 0         | 0         | 0         | 0         | 0         | 14.3      |             | 1         | -1.11-2.89         | <b>0.33</b> |
| Clindamycin                         | 0         | 4         | 0         | 0         | 0         | 0         | 0         | 0         | 14.3      |             | 1         | -0.90-2.96         | <b>0.25</b> |

### Yeast

|                                   |           |           |           |           |           |           |           |           |           |  |          |                   |             |
|-----------------------------------|-----------|-----------|-----------|-----------|-----------|-----------|-----------|-----------|-----------|--|----------|-------------------|-------------|
| <i>Candida albicans</i>           | <b>11</b> | <b>11</b> | <b>22</b> | <b>27</b> | <b>17</b> | <b>17</b> | <b>34</b> | <b>56</b> | <b>43</b> |  | <b>6</b> | <b>2.24-10.12</b> | <b>0.01</b> |
| Fluconazole                       | 0         | 0         | 0         | 0         | 0         | 0         | 0         | 0         | 0         |  |          |                   |             |
| Flucytosin                        | 0         | 0         | 0         | 0         | 0         | 0         | 0         | 3.6       | 4.7       |  | 1        | 0.11-1.24         | <b>0.03</b> |
| Amphotericin                      | 0         | 0         | 0         | 0         | 0         | 0         | 0         | 0         | 0         |  |          |                   |             |
| Anidulafungin                     | 0         | 0         | 0         | 0         | 0         | 0         | 0         | 0         | 0         |  |          |                   |             |
| Voriconazole                      | 0         | 0         | 0         | 0         | 0         | 0         | 0         | 0         | 0         |  |          |                   |             |
| <i>Candida spp (non albicans)</i> | <b>5</b>  | <b>9</b>  | <b>11</b> | <b>17</b> | <b>22</b> | <b>11</b> | <b>21</b> | <b>9</b>  | <b>10</b> |  | <b>1</b> | <b>1.68-3.10</b>  | <b>0.51</b> |
| Fluconazole                       | 0         | 0         | 0         | 5.9       | 13.6      | 9.1       | 9.5       | 33.3      | 20        |  | 5        | 1.88-7.28         | <b>0.01</b> |
| Flucytosin                        | 0         | 0         | 0         | 0         | 0         | 0         | 9.5       | 22.2      | 10        |  | 3%       | 0.48-5.21         | <b>0.02</b> |

|               |   |   |     |   |   |   |   |   |    |    |            |             |
|---------------|---|---|-----|---|---|---|---|---|----|----|------------|-------------|
| Amphotericin  | 0 | 0 | 0   | 0 | 0 | 0 | 0 | 0 | 10 | 1% | -0.33-2.16 | <b>0.13</b> |
| Anidulafungin | 0 | 0 | 0   | 0 | 0 | 0 | 0 | 0 | 0  |    |            |             |
| Voriconazole  | 0 | 0 | 9.1 | 0 | 0 | 0 | 0 | 0 | 10 | 0% | -1.34-2.33 | <b>0.54</b> |

---
