# Supplementary material for: Low incidence of antibiotic-resistant bacteria in south-east Sweden: An epidemiologic study on 9268 cases of bloodstream infection
Source: PubMed Central journal article supplement (PMC7100936; doi:10.1371/journal.pone.0230501), 2020-03-27
Supplement: pone.0230501.s007.pdf [file pone.0230501.s007.pdf]

**S7 Table. Antibacterials for systemic use (J01) excluding metenamine (J01-J01XX05) measured as defined-daily-doses (DDD) per 1.000 inhabitants and day (TIND).**

|                                                                | 2008  | 2009  | 2010  | 2011  | 2012  | 2013  | 2014  | 2015  | 2016  | Change<br>%* | 95% CI**      | p-value** |
|----------------------------------------------------------------|-------|-------|-------|-------|-------|-------|-------|-------|-------|--------------|---------------|-----------|
| Used on hospital wards and polyclinics<br>measured as DDD/TIND | 1.28  | 1.25  | 1.31  | 1.42  | 1.45  | 1.48  | 1.50  | 1.50  | 1.50  | 17           | 0.02-0.05     | <0.01     |
| Dispensed to outpatients measured as<br>DDD/TIND               | 11.75 | 11.47 | 11.61 | 11.36 | 11.26 | 10.84 | 10.53 | 10.28 | 10.22 | -13          | -0.25-(-)0.16 | <0.01     |

\* Change in rate from 2008-2016

\*\*Linear regression, DDD/TIND, 2008-2016.
