# Supplementary material for: Low incidence of antibiotic-resistant bacteria in south-east Sweden: An epidemiologic study on 9268 cases of bloodstream infection
Source: PubMed Central journal article supplement (PMC7100936; doi:10.1371/journal.pone.0230501), 2020-03-27
Supplement: pone.0230501.s008.pdf [file pone.0230501.s008.pdf]

**S8 Table. Amount of antibacterials for systemic use (J01) used on hospital wards and polyclinics measured in defined-daily-doses (DDD) per 1,000 hospital days.**

|                                                              | 2008         | 2009         | 2010         | 2011         | 2012         | 2013         | 2014         | 2015         | 2016         | Change%*  | 95% CI**           | p-value**       |
|--------------------------------------------------------------|--------------|--------------|--------------|--------------|--------------|--------------|--------------|--------------|--------------|-----------|--------------------|-----------------|
| Tetracyclines (J01A)                                         | 87.6         | 87.1         | 80.3         | 96.2         | 102          | 82.6         | 85.9         | 82.0         | 75.0         | -14       | -3.62-1.35         | 0.32            |
| Penicillins with extended spectrum (J01CA)                   | 50.3         | 64.2         | 60.2         | 61.3         | 59.3         | 68.6         | 69.2         | 70.1         | 74.4         | 48        | 1.16-3.48          | <0.01           |
| Beta-lactamase sensitive penicillins (J01CE)                 | 41.1         | 45.7         | 43.9         | 54.9         | 59.9         | 62.2         | 62.5         | 65.9         | 73.5         | 79        | 3.06-4.76          | <0.01           |
| Beta-lactamase resistant penicillins (J01CF)                 | 65.8         | 90.8         | 90.8         | 106.1        | 122.9        | 130.1        | 126.0        | 119.6        | 137.8        | 109       | 4.69-10.94         | <0.01           |
| Combination of penicillins (J01CR)                           | 26.4         | 31.3         | 41.1         | 50.9         | 46.2         | 50.4         | 55.7         | 64.8         | 85.5         | 224       | 4.15-8.04          | <0.01           |
| Cephalosporins (J01DB-DE)                                    | 81.2         | 93.9         | 90.9         | 89.8         | 94.4         | 98           | 94.6         | 95.8         | 100.9        | 24        | 0.59-2.74          | 0.01            |
| Carbapenems (J01DH)                                          | 31.3         | 36.1         | 42           | 46.4         | 47           | 48.6         | 46.7         | 49.9         | 48.0         | 53        | 0.95-3.04          | <0.01           |
| Sulfonamides and trimethoprim (J01E)                         | 25.4         | 22.8         | 20.1         | 18.7         | 17.6         | 15.7         | 17.3         | 17.4         | 20.0         | -21       | -1.49-(-)0.06      | 0.04            |
| Macrolides, lincosamides and streptogramins (J01F)           | 23.5         | 27.2         | 30.5         | 32.6         | 32.7         | 35.3         | 31.1         | 31.6         | 35.1         | 49        | 0.29-1.83          | 0.01            |
| Aminoglycosides (J01GB)                                      | 6.2          | 6.2          | 9.7          | 11.5         | 11           | 9.8          | 10.2         | 9.3          | 7.8          | 26        | -0.34-0.84         | 0.35            |
| Fluoroquinolones (J01MA)                                     | 56.4         | 62.9         | 66.4         | 70.5         | 63.5         | 63.6         | 59.7         | 63.5         | 68.8         | 22        | -0.81-1.85         | 0.39            |
| Vancomycin (J01XA01)                                         | 7.0          | 8.4          | 9.9          | 10.3         | 9.6          | 13           | 11.6         | 12.9         | 15.6         | 123       | 0.60-1.20          | <0.01           |
| Other                                                        | 21.7         | 22.2         | 23.2         | 25.8         | 26.8         | 31.3         | 31.2         | 28.7         | 34.2         | 58        | 1.01-2.02          | <0.01           |
| <b>Total amount of antibacterials for systemic use (J01)</b> | <b>524.0</b> | <b>598.9</b> | <b>609.3</b> | <b>675.1</b> | <b>692.9</b> | <b>709.2</b> | <b>701.8</b> | <b>711.6</b> | <b>776.5</b> | <b>48</b> | <b>17.81-34.43</b> | <b>&lt;0.01</b> |

\* Change in rate from 2008-2016

\*\*Linear regression, DDD/TIND, 2008-2016.
