# Supplementary material for: Low incidence of antibiotic-resistant bacteria in south-east Sweden: An epidemiologic study on 9268 cases of bloodstream infection
Source: PubMed Central journal article supplement (PMC7100936; doi:10.1371/journal.pone.0230501), 2020-03-27
Supplement: pone.0230501.s010.pdf [file pone.0230501.s010.pdf]

**S10 Table. Categories and agents used to define MDR (worksheet for categorizing isolates).**

**Gram-negative**

---

**Other than Enterobacteriaceae**

*Acinetobacter baumannii*

|                  |               |
|------------------|---------------|
| Aminoglycosides  | Tobramycin    |
| Carbapenems      | Meropenem     |
| Carbapenems      | Imipenem      |
| Fluoroquinolones | Ciprofloxacin |
| Aminoglycosides  | Amikacin      |

*Pseudomonas aeruginosa*

|                                                                         |                         |
|-------------------------------------------------------------------------|-------------------------|
| Extended-spectrum cephalosporins; 3rd and 4th generation cephalosporins | Ceftazidime             |
| Carbapenems                                                             | Imipenem                |
| Fluoroquinolones                                                        | Ciprofloxacin           |
| Aminoglycosides                                                         | Tobramycin              |
| Carbapenems                                                             | Meropenem               |
| Antipseudomonal penicillins +b-lactamase inhibitors                     | Piperacillin-Tazobactam |

*Haemophilus influenzae*

|                           |                    |
|---------------------------|--------------------|
| Penicillins               | Penicillin G       |
| Tetracyclines             | Tetracycline       |
| Folate pathway inhibitors | Trimethoprim-sulfa |

**Enterobacteriaceae**

*Escherichia coli*

|                                                                         |                         |
|-------------------------------------------------------------------------|-------------------------|
| Extended-spectrum cephalosporins; 3rd and 4th generation cephalosporins | Cefotaxime              |
| Aminoglycosides                                                         | Tobramycin              |
| Folate pathway inhibitors                                               | Trimethoprim-sulfa      |
| Extended-spectrum cephalosporins; 3rd and 4th generation cephalosporins | Ceftazidime             |
| Antipseudomonal penicillins +b-lactamase inhibitors                     | Piperacillin-Tazobactam |
| Carbapenems                                                             | Meropenem               |
| Carbapenems                                                             | Imipenem                |

|                                                                         |                         |
|-------------------------------------------------------------------------|-------------------------|
| Fluoroquinolones                                                        | Ciprofloxacin           |
| Aminoglycosides                                                         | Amikacin                |
| <b><i>Klebsiella pneumoniae</i></b>                                     |                         |
| Extended-spectrum cephalosporins; 3rd and 4th generation cephalosporins | Cefotaxime              |
| Aminoglycosides                                                         | Tobramycin              |
| Folate pathway inhibitors                                               | Trimethoprimsulfa       |
| Extended-spectrum cephalosporins; 3rd and 4th generation cephalosporins | Ceftazidime             |
| Antipseudomonal penicillins +b-lactamase inhibitors                     | Piperacillin-Tazobactam |
| Carbapenems                                                             | Meropenem               |
| Carbapenems                                                             | Imipenem                |
| Fluoroquinolones                                                        | Ciprofloxacin           |
| Aminoglycosides                                                         | Amikacin                |
| <b><i>Klebsiella oxytoca</i></b>                                        |                         |
| Extended-spectrum cephalosporins; 3rd and 4th generation cephalosporins | Cefotaxime              |
| Aminoglycosides                                                         | Tobramycin              |
| Folate pathway inhibitors                                               | Trimethoprimsulfa       |
| Extended-spectrum cephalosporins; 3rd and 4th generation cephalosporins | Ceftazidime             |
| Antipseudomonal penicillins +b-lactamase inhibitors                     | Piperacillin-Tazobactam |
| Carbapenems                                                             | Meropenem               |
| Carbapenems                                                             | Imipenem                |
| Fluoroquinolones                                                        | Ciprofloxacin           |
| Aminoglycosides                                                         | Amikacin                |
| <b><i>Enterobacter cloacae</i></b>                                      |                         |
| Extended-spectrum cephalosporins; 3rd and 4th generation cephalosporins | Cefotaxime              |
| Aminoglycosides                                                         | Tobramycin              |
| Folate pathway inhibitors                                               | Trimethoprimsulfa       |
| Extended-spectrum cephalosporins; 3rd and 4th generation cephalosporins | Ceftazidim              |

|                                                                         |                         |
|-------------------------------------------------------------------------|-------------------------|
| Antipseudomonal penicillins +b-lactamase inhibitors                     | Piperacillin-Tazobactam |
| Carbapenems                                                             | Meropenem               |
| Carbapenems                                                             | Imipenem                |
| Fluoroquinolones                                                        | Ciprofloxacin           |
| Aminoglycosides                                                         | Amikacin                |
| <b><i>Proteus Mirabilis</i></b>                                         |                         |
| Extended-spectrum cephalosporins; 3rd and 4th generation cephalosporins | Cefotaxime              |
| Aminoglycosides                                                         | Tobramycin              |
| Folate pathway inhibitors                                               | Trimethoprim-sulfa      |
| Extended-spectrum cephalosporins; 3rd and 4th generation cephalosporins | Ceftazidime             |
| Antipseudomonal penicillins +b-lactamase inhibitors                     | Piperacillin-Tazobactam |
| Carbapenems                                                             | Meropenem               |
| Carbapenems                                                             | Imipenem                |
| Fluoroquinolones                                                        | Ciprofloxacin           |
| Aminoglycosides                                                         | Amikacin                |

## Gram-positive

---

### Enterococci

#### ***Enterococcus faecalis***

|                |            |
|----------------|------------|
| Penicillins    | Ampicillin |
| Carbapenems    | Imipenem   |
| Oxazolidinones | Linezolid  |
| Glycopeptides  | Vancomycin |

#### ***Enterococcus faecium***

|                |            |
|----------------|------------|
| Penicillins    | Ampicillin |
| Carbapenems    | Imipenem   |
| Oxazolidinones | Linezolid  |
| Glycopeptides  | Vancomycin |

### Staphylococci

#### ***Staphylococcus aureus***

|                                                |              |
|------------------------------------------------|--------------|
| Anti-staphylococcal b-lactams (or cephamycins) | Cefoxitin    |
| Fucidanes                                      | Fusidic acid |
| Macrolides                                     | Erythromycin |
| Lincosamides                                   | Klindamycin  |
| Aminoglycosides                                | Tobramycin   |
| Oxazolidinones                                 | Linezolid    |
| Ansamycins                                     | Rifampicin   |
| Glycopeptides                                  | Vancomycin   |

### **Streptococci**

#### ***Streptococcus pneumoniae***

|                                                |                    |
|------------------------------------------------|--------------------|
| Anti-staphylococcal b-lactams (or cephamycins) | Oxacillin          |
| Macrolides                                     | Erythromycin       |
| Lincosamides                                   | Clindamycin        |
| Tetracyclines                                  | Tetracycline       |
| Folate pathway inhibitors                      | Trimethoprim-sulfa |
| Penicillins                                    | Penicillin G       |
| Fluoroquinolones                               | Norfloxacin        |

#### ***Streptococcus pyogenes (A)***

|              |              |
|--------------|--------------|
| Penicillins  | Penicillin G |
| Macrolides   | Erythromycin |
| Lincosamides | Klindamycin  |
|              | Penicillin G |

#### ***Streptococcus agalactiae (B)***

|              |              |
|--------------|--------------|
| Penicillins  | Penicillin G |
| Macrolides   | Erythromycin |
| Lincosamides | Clindamycin  |
|              | Penicillin G |

#### ***Streptococcus spp. (C, G)***

|              |              |
|--------------|--------------|
| Penicillins  | Penicillin G |
| Macrolides   | Erythromycin |
| Lincosamides | Clindamycin  |

---
