# Supplementary material for: Low incidence of antibiotic-resistant bacteria in south-east Sweden: An epidemiologic study on 9268 cases of bloodstream infection
Source: PubMed Central journal article supplement (PMC7100936; doi:10.1371/journal.pone.0230501), 2020-03-27
Supplement: pone.0230501.s011.pdf [file pone.0230501.s011.pdf]

**S11 Table. Comorbidity per 100,000 hospital admissions and year (overall BSIs and 30-day all-cause mortality).**

| <b>Overall BSIs (n = 9,268)</b>     | <b>2008</b> | <b>2009</b> | <b>2010</b> | <b>2011</b> | <b>2012</b> | <b>2013</b> | <b>2014</b> | <b>2015</b> | <b>2016</b> | <b>Change<br/>(%)</b> | <b>Average<br/>annual<br/>increase</b> | <b>95%<br/>CI</b> | <b>p-value</b> |
|-------------------------------------|-------------|-------------|-------------|-------------|-------------|-------------|-------------|-------------|-------------|-----------------------|----------------------------------------|-------------------|----------------|
| <b>Number of comorbidities</b>      |             |             |             |             |             |             |             |             |             |                       |                                        |                   |                |
| <b>0</b>                            | 248         | 344         | 352         | 382         | 408         | 408         | 458         | 489         | 435         | 75%                   | 24                                     | 14-34             | <0.01          |
| <b>1</b>                            | 268         | 334         | 383         | 340         | 387         | 403         | 384         | 381         | 457         | 71%                   | 16                                     | 7-25              | <0.01          |
| <b>2</b>                            | 185         | 191         | 219         | 219         | 249         | 294         | 271         | 247         | 233         | 26%                   | 9                                      | 0.6-17            | 0.04           |
| <b>&gt;2</b>                        | 272         | 280         | 378         | 370         | 438         | 424         | 474         | 490         | 485         | 78%                   | 29                                     | 20-37             | <0.01          |
| <b>30-day mortality (n = 1,237)</b> |             |             |             |             |             |             |             |             |             |                       |                                        |                   |                |
| <b>Number of comorbidities</b>      |             |             |             |             |             |             |             |             |             |                       |                                        |                   |                |
| <b>0</b>                            | 23          | 18          | 19          | 24          | 24          | 25          | 17          | 25          | 25          | 9%                    | 0.4                                    | -0.6-1.4          | 0.39           |
| <b>1</b>                            | 40          | 52          | 45          | 57          | 50          | 56          | 46          | 37          | 33          | -18%                  | -1.3                                   | -3.8-1.2          | 0.27           |
| <b>2</b>                            | 48          | 47          | 55          | 42          | 50          | 49          | 46          | 41          | 33          | -31%                  | -1.5                                   | -3.1-0.2          | 0.07           |
| <b>&gt;2</b>                        | 50          | 54          | 62          | 69          | 72          | 74          | 82          | 91          | 99          | 98%                   | 6                                      | 5.1-6.6           | <0.01          |
